# Supplementary material
Source: Springer Nature journal article supplement (https://www.springermedizin.de/resource/supplementary/12943_2010_637_MOESM4_ESM.pdf/9554456)

**A****SCP2TR**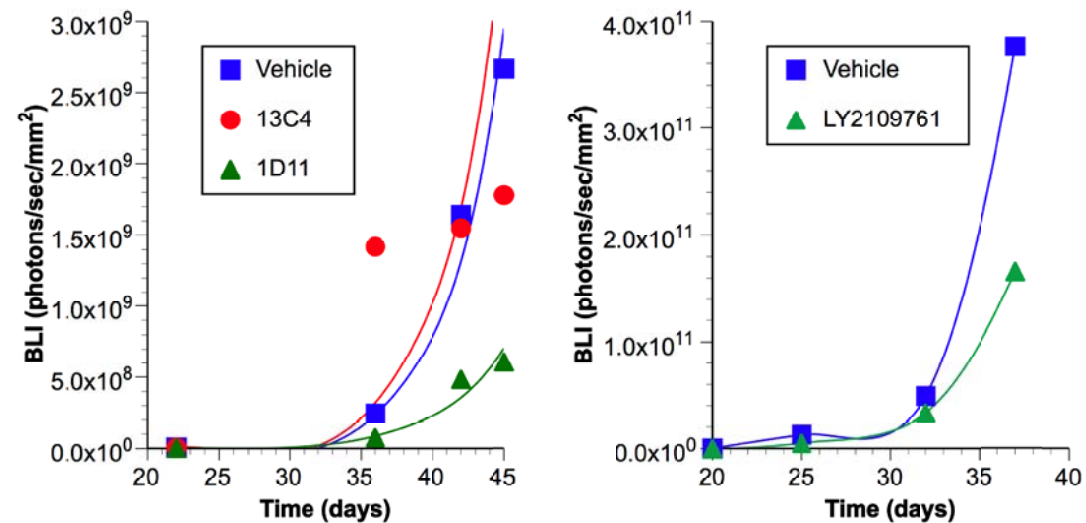**D****4175TR**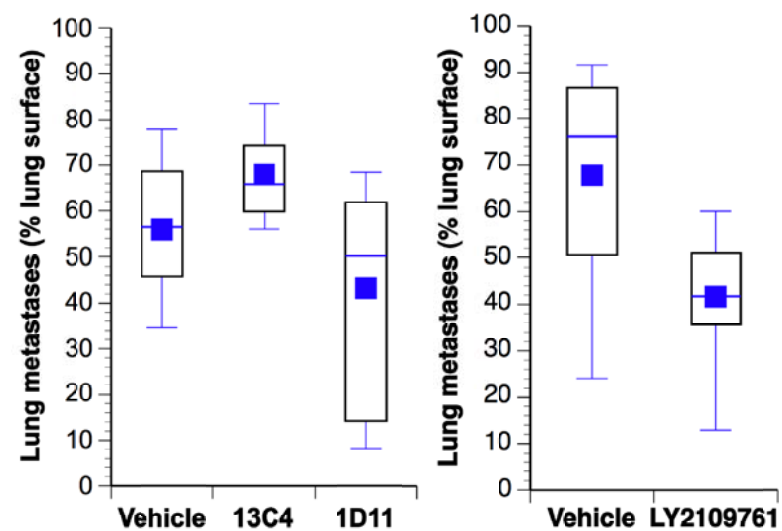**B**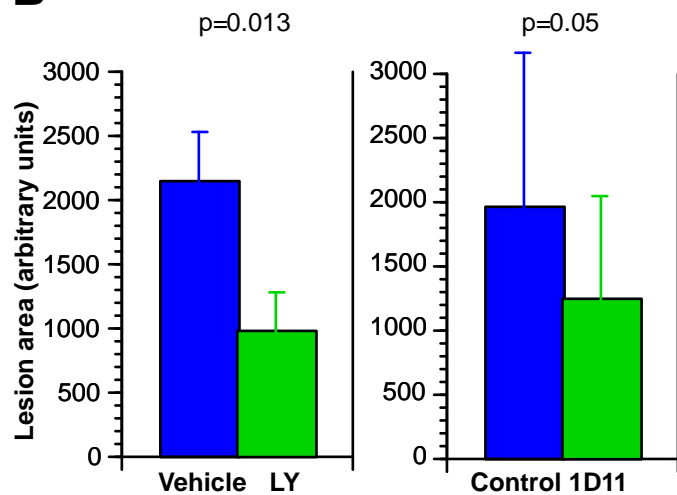**C**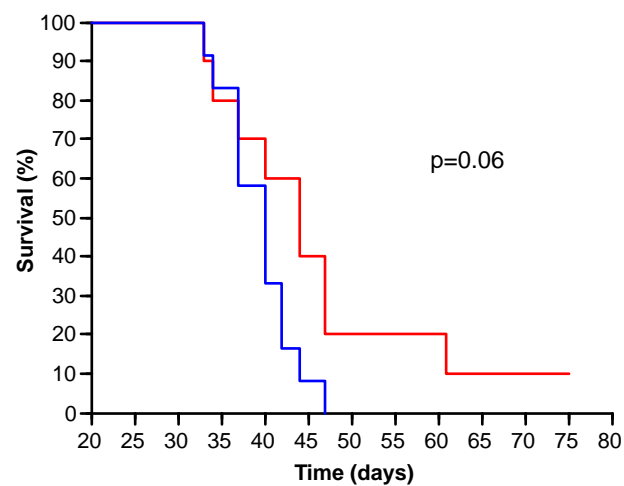**E****2860**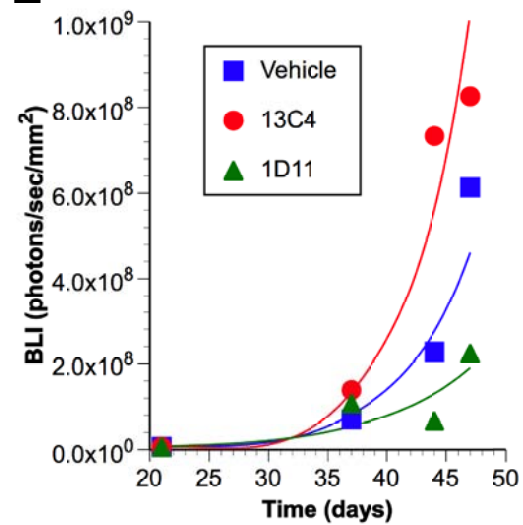

Supplement: MOESM4 [file 9554456]
